# Supplementary material for: Implementation of Pre-emptive Pharmacogenomics Testing in Outpatient Clinics in Asia (IMPT study)
Source: bioRxiv or medRxiv preprint supplement (doi:10.1101/2024.07.19.24310681), 2024-07-19
Supplement: Supplementary file [file media-2.pdf]

Supplementary Material S2: Survey Questions

**Survey 1: Patient Recruitment Survey**

|                                                                                                                                                                                                                                                                                                                                                                                                                                                                                                                                                                                                                                                                                                                                                                                                                        |                                                                                                                                                                  |
|------------------------------------------------------------------------------------------------------------------------------------------------------------------------------------------------------------------------------------------------------------------------------------------------------------------------------------------------------------------------------------------------------------------------------------------------------------------------------------------------------------------------------------------------------------------------------------------------------------------------------------------------------------------------------------------------------------------------------------------------------------------------------------------------------------------------|------------------------------------------------------------------------------------------------------------------------------------------------------------------|
| 1. Full Name                                                                                                                                                                                                                                                                                                                                                                                                                                                                                                                                                                                                                                                                                                                                                                                                           | <ul style="list-style-type: none"> <li>• [Open-ended response]</li> </ul>                                                                                        |
| 2. Contact Number                                                                                                                                                                                                                                                                                                                                                                                                                                                                                                                                                                                                                                                                                                                                                                                                      | <ul style="list-style-type: none"> <li>• [Open-ended response]</li> </ul>                                                                                        |
| 3. Email Address                                                                                                                                                                                                                                                                                                                                                                                                                                                                                                                                                                                                                                                                                                                                                                                                       | <ul style="list-style-type: none"> <li>• [Open-ended response]</li> </ul>                                                                                        |
| 4. How old are you? (in years)                                                                                                                                                                                                                                                                                                                                                                                                                                                                                                                                                                                                                                                                                                                                                                                         | <ul style="list-style-type: none"> <li>• [Open-ended response]</li> </ul>                                                                                        |
| 5. In your opinion, how healthy are you right now?                                                                                                                                                                                                                                                                                                                                                                                                                                                                                                                                                                                                                                                                                                                                                                     | <ul style="list-style-type: none"> <li>• Healthy</li> <li>• Somewhat healthy</li> <li>• Unhealthy</li> <li>• Very Healthy</li> </ul>                             |
| <p>6. How interested are you in learning about genetic risk for the following conditions? (Optional)</p> <ul style="list-style-type: none"> <li>a. Osteoarthritis</li> <li>b. Rheumatoid arthritis</li> <li>c. Asthma</li> <li>d. Celiac disease</li> <li>e. Ulcerative colitis</li> <li>f. Breast cancer</li> <li>g. Colorectal cancer</li> <li>h. Leukemia</li> <li>i. Lung cancer</li> <li>j. Prostate cancer</li> <li>k. Skin cancer</li> <li>l. Heart disease</li> <li>m. Blood coagulation/embolic disease</li> <li>n. Chronic Kidney Disease</li> <li>o. High cholesterol</li> <li>p. Diabetes</li> <li>q. Glaucoma</li> <li>r. Bipolar disorder</li> <li>s. Alzheimer's disease</li> <li>t. Lou Gehrig's disease</li> <li>u. Multiple sclerosis</li> <li>v. Parkinson's disease</li> <li>w. Obesity</li> </ul> | <ul style="list-style-type: none"> <li>• Not interested at all</li> <li>• Somewhat uninterested</li> <li>• Interested</li> <li>• Very interested</li> </ul>      |
| 7. How did you first hear about genetic testing for drug response?                                                                                                                                                                                                                                                                                                                                                                                                                                                                                                                                                                                                                                                                                                                                                     | <ul style="list-style-type: none"> <li>• Your doctor</li> <li>• Friends and family</li> <li>• Social media</li> <li>• News</li> <li>• Other companies</li> </ul> |

|                                                                                                                                                                                                                                                                                                                                                                                                                                                                                                  |                                                                                                                                                                                                                                                                                                                                                                     |
|--------------------------------------------------------------------------------------------------------------------------------------------------------------------------------------------------------------------------------------------------------------------------------------------------------------------------------------------------------------------------------------------------------------------------------------------------------------------------------------------------|---------------------------------------------------------------------------------------------------------------------------------------------------------------------------------------------------------------------------------------------------------------------------------------------------------------------------------------------------------------------|
|                                                                                                                                                                                                                                                                                                                                                                                                                                                                                                  | <ul style="list-style-type: none"> <li>• I have never heard of genetic testing for drug response</li> <li>• Other (please specify):<br/>[Open-ended response]</li> </ul>                                                                                                                                                                                            |
| 8. What is the reason you are seeing the doctor today?                                                                                                                                                                                                                                                                                                                                                                                                                                           | <ul style="list-style-type: none"> <li>• Routine check-up</li> <li>• To consult on a health problem</li> <li>• Follow-up for a chronic illness or post-operation</li> <li>• Accompanying a patient</li> <li>• Other (please specify):<br/>[Open-ended response]</li> </ul>                                                                                          |
| 9. To what extent did the following factors play a part in your decision to be tested? <ul style="list-style-type: none"> <li>a. Helpfulness in optimizing my treatment</li> <li>b. Recommendation from my healthcare provider</li> <li>c. Recommendation from my family or friends</li> <li>d. Self-curiosity</li> <li>e. Out-of-pocket cost</li> <li>f. Personal experience or stories of side effects caused by medication</li> <li>g. Safety of personal medical and genetic data</li> </ul> | <ul style="list-style-type: none"> <li>• Not at all</li> <li>• Very little</li> <li>• Somewhat</li> <li>• To a great extent</li> </ul>                                                                                                                                                                                                                              |
| 10. Are you currently taking any chronic medication?                                                                                                                                                                                                                                                                                                                                                                                                                                             | <ul style="list-style-type: none"> <li>• Yes</li> <li>• No</li> </ul>                                                                                                                                                                                                                                                                                               |
| 11. Do you expect to take any daily/chronic medication in the future?                                                                                                                                                                                                                                                                                                                                                                                                                            | <ul style="list-style-type: none"> <li>• Yes</li> <li>• No</li> </ul>                                                                                                                                                                                                                                                                                               |
| 12. Have you taken any of the following medication before?                                                                                                                                                                                                                                                                                                                                                                                                                                       | <ul style="list-style-type: none"> <li>• Allopurinol</li> <li>• Amitriptyline</li> <li>• Aripiprazole</li> <li>• Atomoxetine</li> <li>• Celecoxib</li> <li>• Citalopram</li> <li>• Clomipramine</li> <li>• Clopidogrel</li> <li>• Codeine</li> <li>• Doxepin</li> <li>• Escitalopram</li> <li>• Flecainide</li> <li>• Fluvoxamine</li> <li>• Haloperidol</li> </ul> |

|                                                                                                  |                                                                                                                                                                                                                                                                                                                                                                                                |
|--------------------------------------------------------------------------------------------------|------------------------------------------------------------------------------------------------------------------------------------------------------------------------------------------------------------------------------------------------------------------------------------------------------------------------------------------------------------------------------------------------|
|                                                                                                  | <ul style="list-style-type: none"> <li>• Imipramine</li> <li>• Lansoprazole</li> <li>• Metoprolol</li> <li>• Nortriptyline</li> <li>• Omeprazole</li> <li>• Ondansetron</li> <li>• Paroxetine</li> <li>• Propafenone</li> <li>• Sertraline</li> <li>• Simvastatin</li> <li>• Tamoxifen</li> <li>• Tramadol</li> <li>• Venlafaxine</li> <li>• Voriconazole</li> <li>• Zuclopenthixol</li> </ul> |
| <p>13. Have you ever been diagnosed or is currently diagnosed with the following conditions?</p> | <ul style="list-style-type: none"> <li>• Type 2 Diabetes Mellitus</li> <li>• Hypertension</li> <li>• Gout</li> <li>• Anxiety</li> <li>• Stroke</li> <li>• Rheumatoid arthritis</li> <li>• Osteoarthritis</li> <li>• Hyperlipidemia (high cholesterol)</li> <li>• Ischaemic heart disease (heart attack)</li> <li>• Major depressive disorder (depression)</li> </ul>                           |
| <p>14. How many times have you been hospitalized (with overnight stay) within the last year?</p> | <ul style="list-style-type: none"> <li>• [Open-ended response]</li> </ul>                                                                                                                                                                                                                                                                                                                      |
| <p>15. Please list the reason(s) for your hospitalization below: (Check all that apply)</p>      | <ul style="list-style-type: none"> <li>• Accident, poisoning and violence</li> <li>• Cancer</li> <li>• Acute respiratory infection</li> <li>• Skin infection</li> <li>• Gastroenterological infection</li> <li>• Heart disease</li> <li>• Cerebrovascular diseases (including stroke)</li> <li>• Pregnancy complications affecting foetus and newborn</li> </ul>                               |

|                                                                                                                                                                                                                                                                                                           |                                                                                                                                                                                                                                                                                                                                                                                                                                                                                                                               |
|-----------------------------------------------------------------------------------------------------------------------------------------------------------------------------------------------------------------------------------------------------------------------------------------------------------|-------------------------------------------------------------------------------------------------------------------------------------------------------------------------------------------------------------------------------------------------------------------------------------------------------------------------------------------------------------------------------------------------------------------------------------------------------------------------------------------------------------------------------|
|                                                                                                                                                                                                                                                                                                           | <ul style="list-style-type: none"> <li>• Other (please specify):<br/>[Open-ended response]</li> </ul>                                                                                                                                                                                                                                                                                                                                                                                                                         |
| 16. How many times have you visited a hospital within the last year (excluding health screening and hospitalization)?                                                                                                                                                                                     | <ul style="list-style-type: none"> <li>• [Open-ended response]</li> </ul>                                                                                                                                                                                                                                                                                                                                                                                                                                                     |
| 17. Please list the reason(s) for your hospital visit below: (Check all that apply)                                                                                                                                                                                                                       | <ul style="list-style-type: none"> <li>• Cancer</li> <li>• Ear, Nose &amp; Throat Conditions (e.g., General ENT, Allergy Testing)</li> <li>• Eye Conditions (e.g., Cataract, Refractive Surgery)</li> <li>• Heart Conditions</li> <li>• Neurology Conditions (e.g., Epilepsy)</li> <li>• Pain Management (e.g., Arthritis, Spinal Pain)</li> <li>• Skin Conditions (e.g., Skin Rash)</li> <li>• Urology (e.g., Kidney Stones, Urinary Tract Problems)</li> <li>• Other (please specify):<br/>[Open-ended response]</li> </ul> |
| 18. Have your doctor told you that you experience adverse drug reaction before in your lifetime?                                                                                                                                                                                                          | <ul style="list-style-type: none"> <li>• Yes</li> <li>• No</li> <li>• I'm not sure</li> <li>• Other (please specify):<br/>[Open-ended response]</li> </ul>                                                                                                                                                                                                                                                                                                                                                                    |
| 19. Have you ever felt that your medication did not work as expected?                                                                                                                                                                                                                                     | <ul style="list-style-type: none"> <li>• Yes</li> <li>• No</li> <li>• I'm not sure</li> </ul>                                                                                                                                                                                                                                                                                                                                                                                                                                 |
| 20. If yes, please list the name of medication that might have caused this:                                                                                                                                                                                                                               | <ul style="list-style-type: none"> <li>• [Open-ended response]</li> </ul>                                                                                                                                                                                                                                                                                                                                                                                                                                                     |
| 21. Have you suspected your direct family member or others of experiencing adverse drug reaction before in their lifetime?<br>a. Father<br>b. Mother<br>c. Sibling<br>d. Paternal Grandfather<br>e. Paternal Grandmother<br>f. Maternal Grandfather<br>g. Maternal Grandmother<br>h. Other family members | <ul style="list-style-type: none"> <li>• Yes</li> <li>• No</li> <li>• Maybe</li> </ul>                                                                                                                                                                                                                                                                                                                                                                                                                                        |

|                                                                                                                                           |                                                                                                      |
|-------------------------------------------------------------------------------------------------------------------------------------------|------------------------------------------------------------------------------------------------------|
| i. Not a family member                                                                                                                    |                                                                                                      |
| 22. If you have answered "Yes" to the previous question, please list down what are the medications that caused the adverse drug reaction. | <ul style="list-style-type: none"><li data-bbox="995 241 1378 277">• [Open-ended response]</li></ul> |

**Survey 2: Patient 3 Months Post-test Follow-up Survey**

|                                                                                                                                                                                                                                                                                                                                                                                                                                                                                                                                                                                                                                                                                                                                                               |                                                                                                                                                                                                                                                                                                                                                                                                           |
|---------------------------------------------------------------------------------------------------------------------------------------------------------------------------------------------------------------------------------------------------------------------------------------------------------------------------------------------------------------------------------------------------------------------------------------------------------------------------------------------------------------------------------------------------------------------------------------------------------------------------------------------------------------------------------------------------------------------------------------------------------------|-----------------------------------------------------------------------------------------------------------------------------------------------------------------------------------------------------------------------------------------------------------------------------------------------------------------------------------------------------------------------------------------------------------|
| <p><b>Section 1: My Testing Experience</b></p> <p>1. Please help us to understand your testing experience by selecting which of the following BEST describes it</p> <ul style="list-style-type: none"> <li>a. The ordering process (ordering, consent taking, cheek swabbing) of my pharmacogenomics testing kit was easy and straightforward.</li> <li>b. I find pharmacogenomics testing to be helpful to me in my healthcare decision-making at this time.</li> <li>c. I believe pharmacogenomics testing will be helpful to me in my healthcare decision-making in the future.</li> <li>d. I am satisfied with my decision to take the pharmacogenomics test.</li> <li>e. Overall, I am satisfied with my pharmacogenomics testing experience.</li> </ul> | <ul style="list-style-type: none"> <li>• Strongly Disagree</li> <li>• Somewhat Disagree</li> <li>• Somewhat Agree</li> <li>• Strongly Agree</li> </ul>                                                                                                                                                                                                                                                    |
| <p>2. How did you learn about your pharmacogenomic test results? (Check all that apply)</p>                                                                                                                                                                                                                                                                                                                                                                                                                                                                                                                                                                                                                                                                   | <ul style="list-style-type: none"> <li>• Nala Personal Health Manager Mobile app</li> <li>• In an Email or Message</li> <li>• In-person at a follow-up appointment scheduled with my healthcare provider specifically to view results</li> <li>• In-person at an appointment scheduled for another reason</li> <li>• Can't recall</li> <li>• Other (please specify):<br/>[Open-ended response]</li> </ul> |
| <p>3. What would be your preferred method of receiving your pharmacogenomic test results?</p>                                                                                                                                                                                                                                                                                                                                                                                                                                                                                                                                                                                                                                                                 | <ul style="list-style-type: none"> <li>• Nala Personal Health Manager Mobile app</li> <li>• In an Email or Message</li> <li>• In-person at a follow-up appointment scheduled with my healthcare provider specifically to view results</li> <li>• In-person at an appointment scheduled for another reason</li> </ul>                                                                                      |

|                                                                                                                                                                                                                                         |                                                                                                                                                                                                                         |
|-----------------------------------------------------------------------------------------------------------------------------------------------------------------------------------------------------------------------------------------|-------------------------------------------------------------------------------------------------------------------------------------------------------------------------------------------------------------------------|
|                                                                                                                                                                                                                                         | <ul style="list-style-type: none"> <li>• Other (please specify):<br/>[Open-ended response]</li> </ul>                                                                                                                   |
| 4. I have a clear understanding of my test results from pharmacogenomics testing.                                                                                                                                                       | <ul style="list-style-type: none"> <li>• Strongly disagree</li> <li>• Disagree</li> <li>• Neither agree nor disagree</li> <li>• Agree</li> <li>• Strongly agree</li> </ul>                                              |
| 5. I discussed my pharmacogenomics test results with my healthcare provider.                                                                                                                                                            | <ul style="list-style-type: none"> <li>• Yes</li> <li>• No (if No, please skip the following 2 questions)</li> </ul>                                                                                                    |
| 6. My healthcare provider seemed confident in explaining the meaning of the pharmacogenomics test results to me.                                                                                                                        | <ul style="list-style-type: none"> <li>• Strongly disagree</li> <li>• Disagree</li> <li>• Neither agree nor disagree</li> <li>• Somewhat agree</li> <li>• Strongly agree</li> </ul>                                     |
| 7. After discussing the results with your healthcare provider, did you look up additional information?                                                                                                                                  | <ul style="list-style-type: none"> <li>• Yes</li> <li>• No</li> </ul>                                                                                                                                                   |
| 8. I would like additional follow-up from my healthcare provider to discuss my pharmacogenomics test results.                                                                                                                           | <ul style="list-style-type: none"> <li>• Yes</li> <li>• No</li> </ul>                                                                                                                                                   |
| 9. After learning my pharmacogenomics test results, I am more likely to take medications prescribed by my healthcare provider.                                                                                                          | <ul style="list-style-type: none"> <li>• Strongly disagree</li> <li>• Disagree</li> <li>• Neither agree nor disagree</li> <li>• Somewhat agree</li> <li>• Strongly agree</li> </ul>                                     |
| 10. After learning my pharmacogenomics test results, I feel more confident that medication(s) prescribed to me will not cause side effects and/or will help my condition, compared to past prescriptions I've received without testing. | <ul style="list-style-type: none"> <li>• Strongly disagree</li> <li>• Disagree</li> <li>• Neutral</li> <li>• Agree</li> <li>• Strongly agree</li> <li>• Not Applicable (I currently do not take medications)</li> </ul> |
| 11. After learning my pharmacogenomic test results, I feel more validated about my medication experiences.                                                                                                                              | <ul style="list-style-type: none"> <li>• Strongly disagree</li> <li>• Disagree</li> <li>• Neutral</li> <li>• Agree</li> <li>• Strongly agree</li> </ul>                                                                 |

|                                                                                                                                                                                                                                                                                         |                                                                                                                                                                                                                                                                                                                                                                                                              |
|-----------------------------------------------------------------------------------------------------------------------------------------------------------------------------------------------------------------------------------------------------------------------------------------|--------------------------------------------------------------------------------------------------------------------------------------------------------------------------------------------------------------------------------------------------------------------------------------------------------------------------------------------------------------------------------------------------------------|
|                                                                                                                                                                                                                                                                                         | <ul style="list-style-type: none"> <li>• Not Applicable (I currently do not take medications)</li> </ul>                                                                                                                                                                                                                                                                                                     |
| 12. I believe that the most valuable outcome for me from pharmacogenomics testing is:                                                                                                                                                                                                   | <ul style="list-style-type: none"> <li>• Decreased side effects</li> <li>• Increased medication effectiveness</li> <li>• Decreased cost of medications</li> <li>• Decreased cost of related healthcare services</li> <li>• Decreased trial and error in prescribing my medications</li> <li>• More willing to try new medication</li> <li>• More confidence in my prescribing healthcare provider</li> </ul> |
| <p><b>Section 2: Feelings upon receiving Test Results</b></p> <p>13. Since receiving my test results, I have felt ____ about them:</p> <ol style="list-style-type: none"> <li>a. Disappointed</li> <li>b. Confused</li> <li>c. Regret</li> <li>d. Relieved</li> <li>e. Happy</li> </ol> | <ul style="list-style-type: none"> <li>• Never</li> <li>• Rarely</li> <li>• Occasionally</li> <li>• Often</li> <li>• All the time</li> </ul>                                                                                                                                                                                                                                                                 |
| 14. I discussed my pharmacogenomics test results with a family member.                                                                                                                                                                                                                  | <ul style="list-style-type: none"> <li>• Yes</li> <li>• No (if no, please skip the following question)</li> <li>• I plan to do so</li> </ul>                                                                                                                                                                                                                                                                 |
| 15. After learning about my pharmacogenomics testing experience, one or more of my family members decided to pursue pharmacogenomics testing.                                                                                                                                           | <ul style="list-style-type: none"> <li>• Yes</li> <li>• No</li> <li>• Unsure</li> </ul>                                                                                                                                                                                                                                                                                                                      |



### Survey 3: Principal Investigator End of Recruitment Survey

|                                                                                                                                                                                                                                                                                                                                                                                                                                                                                                                                                                                                                                                                                                                          |                                                                                                                                                                                                                                                                             |
|--------------------------------------------------------------------------------------------------------------------------------------------------------------------------------------------------------------------------------------------------------------------------------------------------------------------------------------------------------------------------------------------------------------------------------------------------------------------------------------------------------------------------------------------------------------------------------------------------------------------------------------------------------------------------------------------------------------------------|-----------------------------------------------------------------------------------------------------------------------------------------------------------------------------------------------------------------------------------------------------------------------------|
| <p><b>Section 1: Patient on-boarding and enrolment process</b></p> <p>1. How difficult was it to convince the participants to take our PGx test?</p>                                                                                                                                                                                                                                                                                                                                                                                                                                                                                                                                                                     | <ul style="list-style-type: none"> <li>• 1 (Easy)</li> <li>• 2</li> <li>• 3</li> <li>• 4 (Difficult)</li> </ul>                                                                                                                                                             |
| <p>2. On average, how long did it take to convince the participant to participate in the PGx testing?</p>                                                                                                                                                                                                                                                                                                                                                                                                                                                                                                                                                                                                                | <ul style="list-style-type: none"> <li>• [Open-ended response]</li> </ul>                                                                                                                                                                                                   |
| <p>3. What were the concerns the participants had when you offered them our PGx test?</p> <ol style="list-style-type: none"> <li>a. Patient does not understand what PGx testing is for even after explaining</li> <li>b. Patient does not see the benefit of PGx testing</li> <li>c. Patient is afraid that the PGx test is expensive OR it will cause his/her medical services to be more expensive in the future</li> <li>d. Patient is afraid that the results will affect their lifestyle in the future</li> <li>e. Patient is afraid that the results will affect their employability in the future</li> <li>f. Patient is afraid that the results will affect their medical insurability in the future</li> </ol> | <ul style="list-style-type: none"> <li>• Strongly Disagree</li> <li>• Disagree</li> <li>• Agree</li> <li>• Strongly Agree</li> </ul>                                                                                                                                        |
| <p>4. How often do the participants ask these following questions?</p> <ol style="list-style-type: none"> <li>a. What is PGx test</li> <li>b. Cost of the PGx test</li> <li>c. When and how will they receive the test</li> <li>d. The reason they need the test</li> <li>e. How will the test impact them and their family members</li> </ol>                                                                                                                                                                                                                                                                                                                                                                           | <ul style="list-style-type: none"> <li>• Never asked</li> <li>• Seldom asked</li> <li>• Sometimes asked</li> <li>• Often asked</li> <li>• Always asked</li> </ul>                                                                                                           |
| <p>5. Please list other questions the patients asked about.</p>                                                                                                                                                                                                                                                                                                                                                                                                                                                                                                                                                                                                                                                          | <ul style="list-style-type: none"> <li>• [Open-ended response]</li> </ul>                                                                                                                                                                                                   |
| <p>6. What were the participants' enrolled primary (initial) intention of seeing you?</p>                                                                                                                                                                                                                                                                                                                                                                                                                                                                                                                                                                                                                                | <p>Please rank the responses below from 1 (most common) to 5 (least common)</p> <ul style="list-style-type: none"> <li>• To consult you about their acute conditions (e.g. fever, gastritis, headache, pain etc)</li> <li>• and/or to obtain Medical Certificate</li> </ul> |

|                                                                                                                                               |                                                                                                                                                                                                                                                                                                                                                                                                                                                                                                                                 |
|-----------------------------------------------------------------------------------------------------------------------------------------------|---------------------------------------------------------------------------------------------------------------------------------------------------------------------------------------------------------------------------------------------------------------------------------------------------------------------------------------------------------------------------------------------------------------------------------------------------------------------------------------------------------------------------------|
|                                                                                                                                               | <ul style="list-style-type: none"> <li>• To consult you about their chronic conditions</li> <li>• To consult you on their routine scheduled health check-up</li> <li>• To accompany their family/friends on their medical consultation</li> <li>• To follow-up on their recent hospitalization or medical procedure</li> </ul>                                                                                                                                                                                                  |
| 7. What are the other problems or trends observed during recruitment process? (Optional)                                                      | <ul style="list-style-type: none"> <li>• [Open-ended response]</li> </ul>                                                                                                                                                                                                                                                                                                                                                                                                                                                       |
| 8. Please let us know how we can improve the workflow in the future. (Optional)                                                               | <ul style="list-style-type: none"> <li>• [Open-ended response]</li> </ul>                                                                                                                                                                                                                                                                                                                                                                                                                                                       |
| 9. Please rank these values in terms of importance for the participant:                                                                       | <p>Please rank the responses below from 1 (most important) to 7 (least important)</p> <ul style="list-style-type: none"> <li>• The reason for the test</li> <li>• The cost of the test</li> <li>• The implication of the test towards their lifestyle</li> <li>• The implication of the test towards their employability</li> <li>• The implication of the test towards their medical insurability</li> <li>• How trustworthy the genetic testing company is</li> <li>• How secure their genetic data will be stored</li> </ul> |
| <p><b>Section 2: Review of the web interface (Nala Clinical Decision Support)</b></p> <p>10. The platform I used for receiving results is</p> | <ul style="list-style-type: none"> <li>• EHR-integrated module</li> <li>• Web application provided by Nalagenetics (Nala Clinical Decision Support)</li> <li>• Both</li> </ul>                                                                                                                                                                                                                                                                                                                                                  |
| 11. Please indicate how frequently you use each of the pages listed below on your Nala CDS web application.                                   | <ul style="list-style-type: none"> <li>• Never</li> <li>• Rarely</li> <li>• Sometimes</li> </ul>                                                                                                                                                                                                                                                                                                                                                                                                                                |

|                                                                                                                                                                                                                                                                                                                                                                                                                                                                                                             |                                                                                                                                                                                                           |
|-------------------------------------------------------------------------------------------------------------------------------------------------------------------------------------------------------------------------------------------------------------------------------------------------------------------------------------------------------------------------------------------------------------------------------------------------------------------------------------------------------------|-----------------------------------------------------------------------------------------------------------------------------------------------------------------------------------------------------------|
| <ul style="list-style-type: none"> <li>a. Dashboard</li> <li>b. Orders</li> <li>c. Reports</li> <li>d. Patients</li> <li>e. Bulk Order</li> <li>f. Profile Settings</li> </ul>                                                                                                                                                                                                                                                                                                                              | <ul style="list-style-type: none"> <li>• Often</li> <li>• Always</li> </ul>                                                                                                                               |
| <p>12. On a scale of 1- 5, how would you rate your experience of using the Nala CDS Platform?</p>                                                                                                                                                                                                                                                                                                                                                                                                           | <ul style="list-style-type: none"> <li>• 1 (Poor)</li> <li>• 2</li> <li>• 3</li> <li>• 4</li> <li>• 5 (Excellent)</li> </ul>                                                                              |
| <p>13. On a scale of 1-10, how likely are you to recommend Nala CDS Platform (either as EHR-integrated module, standalone web app, or both) to a friend or colleague in a similar profession?</p>                                                                                                                                                                                                                                                                                                           | <ul style="list-style-type: none"> <li>• 1 (Very unlikely)</li> <li>• 2</li> <li>• 3</li> <li>• 4</li> <li>• 5</li> <li>• 6</li> <li>• 7</li> <li>• 8</li> <li>• 9</li> <li>• 10 (Very likely)</li> </ul> |
| <p>14. What improvements would you suggest for Nala CDS Platform?</p>                                                                                                                                                                                                                                                                                                                                                                                                                                       | <ul style="list-style-type: none"> <li>• [Open-ended response]</li> </ul>                                                                                                                                 |
| <p>15. In the future, would you be interested to participate in our user research on Nala CDS?</p>                                                                                                                                                                                                                                                                                                                                                                                                          | <ul style="list-style-type: none"> <li>• Yes</li> <li>• No</li> </ul>                                                                                                                                     |
| <p><b>Section 3: Feedback on Nalagenetics</b><br/> <b>Operational Staff</b><br/> 16. The operational staff is:</p> <ul style="list-style-type: none"> <li>a. Helpful -takes the initiative to check if there is anything wrong</li> <li>b. Resourceful -knows how to solve complicated and unexpected problems</li> <li>c. Responsive -replies in a timely manner</li> <li>d. Articulate -able to communicate effectively</li> <li>e. Friendly -maintains good rapport with you and clinic staff</li> </ul> | <ul style="list-style-type: none"> <li>• Strongly Disagree</li> <li>• Disagree</li> <li>• Agree</li> <li>• Strongly Agree</li> </ul>                                                                      |
| <p>17. What can be improved from the operational staff? Please fill in if you have answered "Disagree or Strongly Disagree" in any of the above questions.</p>                                                                                                                                                                                                                                                                                                                                              | <ul style="list-style-type: none"> <li>• [Open-ended response]</li> </ul>                                                                                                                                 |
| <p>18. Please rate the following</p>                                                                                                                                                                                                                                                                                                                                                                                                                                                                        | <ul style="list-style-type: none"> <li>• Strongly Disagree</li> <li>• Disagree</li> </ul>                                                                                                                 |

|                                                                                                                                                                                                                                                                                                            |                                                                                                                                                                                                                                                                                                                                                                                                                                                                                                              |
|------------------------------------------------------------------------------------------------------------------------------------------------------------------------------------------------------------------------------------------------------------------------------------------------------------|--------------------------------------------------------------------------------------------------------------------------------------------------------------------------------------------------------------------------------------------------------------------------------------------------------------------------------------------------------------------------------------------------------------------------------------------------------------------------------------------------------------|
| <p>a. The operational staff helped in convincing the participants to take the test</p> <p>b. The operational staff helped ensure the workflow is smooth</p>                                                                                                                                                | <ul style="list-style-type: none"> <li>• Agree</li> <li>• Strongly Agree</li> </ul>                                                                                                                                                                                                                                                                                                                                                                                                                          |
| <p><b>Section 4: Your perception on PGx testing and future PGx</b></p> <p>19. How important will these factors be for you when making a decision for patients to take a PGx test?</p>                                                                                                                      | <p>Please rank these factors from 1 (most important) to 8 (least important)</p> <ul style="list-style-type: none"> <li>• Patient's family history</li> <li>• Patient's current medication</li> <li>• Familiarity with the testing company</li> <li>• Scientific basis of the PGx test</li> <li>• Patient's comorbidities</li> <li>• Patient's demographics (gender, age, race)</li> <li>• Patient's financial capability</li> <li>• Patient's history of therapy failure or adverse drug reaction</li> </ul> |
| <p>20. I plan to use PGx test in the future to:</p> <p>a. Guide future drug selection when appropriate</p> <p>b. Guide future dosing when appropriate</p> <p>c. Guide future drug monitoring when appropriate</p> <p>d. Call for pharmacy consultation</p> <p>e. I do not plan to use PGx test anymore</p> | <ul style="list-style-type: none"> <li>• Strongly Disagree</li> <li>• Disagree</li> <li>• Agree</li> <li>• Strongly Agree</li> </ul>                                                                                                                                                                                                                                                                                                                                                                         |
| <p>21. I expect to order or recommend PGx test in the next 6 months</p>                                                                                                                                                                                                                                    | <ul style="list-style-type: none"> <li>• 1 (Very unlikely)</li> <li>• 2</li> <li>• 3</li> <li>• 4 (Very likely)</li> </ul>                                                                                                                                                                                                                                                                                                                                                                                   |
| <p>22. In order to increase the likelihood of myself ordering PGx test in the future for the management of my patients' drug therapy, I would need: *</p>                                                                                                                                                  | <p>Please rank the following statements with 1 being most useful and 9 being least useful</p> <ul style="list-style-type: none"> <li>• Better knowledge of genetics</li> <li>• Better knowledge of pharmacology</li> <li>• Insurance coverage for patients</li> </ul>                                                                                                                                                                                                                                        |

|                                                                                               |                                                                                                                                                                                                                                                                                                                                                                                                                                                         |
|-----------------------------------------------------------------------------------------------|---------------------------------------------------------------------------------------------------------------------------------------------------------------------------------------------------------------------------------------------------------------------------------------------------------------------------------------------------------------------------------------------------------------------------------------------------------|
|                                                                                               | <ul style="list-style-type: none"> <li>• More traction within Singapore medical community</li> <li>• Support from my working institution</li> <li>• Available live assistance from an expert in genetics</li> <li>• Better knowledge on medicinal chemistry (pharmacokinetics and pharmacodynamics)</li> <li>• Stronger evidence that pharmacogenetics improves clinical outcomes</li> <li>• Clearer legal regulations regarding PGx testing</li> </ul> |
| <p>23. What do you think is missing from the current recruitment and on-boarding process?</p> | <ul style="list-style-type: none"> <li>• [Open-ended response]</li> </ul>                                                                                                                                                                                                                                                                                                                                                                               |
| <p>24. If you have more comments, please feel free to write them down below.</p>              | <ul style="list-style-type: none"> <li>• [Open-ended response]</li> </ul>                                                                                                                                                                                                                                                                                                                                                                               |
